# Supplementary material for: Genome-Wide Profiling of WRKY Genes Involved in Benzylisoquinoline Alkaloid Biosynthesis in California Poppy (Eschscholzia californica)
Source: Front Plant Sci. 2021 Jun 17;12:699326. doi: 10.3389/fpls.2021.699326 (PMC8248504; doi:10.3389/fpls.2021.699326)
Supplement: Supplementary file 2 [file Table_1.XLSX]

## Sheet: Sheet1
Supplementary Table S1 Validation of WRKY transcription factors of E. californica by BLAST.
Name	Gene ID	CDS_length	Protein_length	BLASTn, Eschscholzia californica (using Phytometasyn database)	E-value	Predicted protein length	BLASTx, Arabidopsis thaliana	E-value	Protein length	BLASTx, other BIA-producing plants	E-value	Protein length
EcWRKY1	Eca_sc000058.1_g0310.1	1596	531	MAGPIE:eca_ECARTPF1_Velvet--Contig19538	0	534	RecName: Full=Probable WRKY transcription factor 33; AltName: Full=WRKY DNA-binding protein 33	6e-102	519	DNA-binding WRKY [Macleaya cordata], OVA17217.1	5e-176	616
EcWRKY2	Eca_sc000993.1_g1210.1	1455	484	MAGPIE:eca_ECARTPF1_Velvet--Contig3752	0	484	RecName: Full=Probable WRKY transcription factor 4; AltName: Full=WRKY DNA-binding protein 4 [Arabidopsis thaliana]	3e-128	514	DNA-binding WRKY [Macleaya cordata], OVA08821.1	0	505
EcWRKY3	Eca_sc003413.1_g2610.1	1446	481	MAGPIE:eca_ECARTPF1_Velvet--Singlet5892	0	304	RecName: Full=WRKY transcription factor 44; AltName: Full=Protein TRANSPARENT TESTA GLABRA 2; AltName: Full=WRKY DNA-binding protein 44 [Arabidopsis thaliana]	2e-102	429	DNA-binding WRKY [Macleaya cordata], OVA18208.1	0	481
EcWRKY4	Eca_sc002150.1_g1640.1	1107	368	MAGPIE:eca_ECARTPF1_Velvet--Contig3752	8e-69	484	RecName: Full=Probable WRKY transcription factor 4; AltName: Full=WRKY DNA-binding protein 4 [Arabidopsis thaliana]	1e-81	514	DNA-binding WRKY [Macleaya cordata], OVA13402.1	8e-138	515
EcWRKY5	Eca_sc001139.1_g0510.1	2190	729	MAGPIE:eca_ECARTPF1_Velvet--Contig27396	0	729	RecName: Full=Probable WRKY transcription factor 2; AltName: Full=WRKY DNA-binding protein 2 [Arabidopsis thaliana]	2e-120	687	DNA-binding WRKY [Macleaya cordata], OVA04145.1	0	724
EcWRKY6	Eca_sc001139.1_g2480.1	828	275	MAGPIE:eca_ECARTPF1_Velvet--Singlet44953	0	342	RecName: Full=Probable WRKY transcription factor 53; AltName: Full=WRKY DNA-binding protein 53 [Arabidopsis thaliana]	2e-40	324	DNA-binding WRKY [Macleaya cordata], OVA01933.1	2e-96	344
EcWRKY7	Eca_sc000967.1_g1460.1	2118	705	MAGPIE:eca_ECARTPF1_Velvet--Contig27396	0	729	RecName: Full=Probable WRKY transcription factor 2; AltName: Full=WRKY DNA-binding protein 2 [Arabidopsis thaliana]	3e-137	687	probable WRKY transcription factor 2 [Papaver somniferum]	0	722
EcWRKY8	Eca_sc016018.1_g0010.1	1893	630	MAGPIE:eca_ECARTPF1_Velvet--Singlet28363	0	872	RecName: Full=Probable WRKY transcription factor 20; AltName: Full=WRKY DNA-binding protein 20 [Arabidopsis thaliana]	1e-149	557	DNA-binding WRKY [Macleaya cordata], OVA15113.1	0	637
EcWRKY9	Eca_sc000141.1_g0430.1	2364	787	MAGPIE:eca_ECARTPF1_Velvet--Singlet29960	0	739	RecName: Full=Probable WRKY transcription factor 2; AltName: Full=WRKY DNA-binding protein 2 [Arabidopsis thaliana]	2e-97	687	DNA-binding WRKY [Macleaya cordata], OVA19096.1	0	792
EcWRKY10	Eca_sc194739.1_g0350.1	1362	453	MAGPIE:eca_ECARTPF1_Velvet--Contig9651	0	453	RecName: Full=WRKY transcription factor 44; AltName: Full=Protein TRANSPARENT TESTA GLABRA 2; AltName: Full=WRKY DNA-binding protein 44 [Arabidopsis thaliana]	3e-77	429	DNA-binding WRKY [Macleaya cordata], OVA09944.1	4e-170	466
EcWRKY11	Eca_sc194475.1_g0580.1	876	291	MAGPIE:eca_ECARTPF1_Velvet--Contig4538	0	296	RecName: Full=Probable WRKY transcription factor 46; AltName: Full=WRKY DNA-binding protein 46 [Arabidopsis thaliana]	3e-17	295	DNA-binding WRKY [Macleaya cordata], OVA11453.1	5e-33	347
EcWRKY12	Eca_sc026098.1_g0870.1	933	310	MAGPIE:eca_ECARTPF1_Velvet--Contig5316	0	309	RecName: Full=Probable WRKY transcription factor 70; AltName: Full=WRKY DNA-binding protein 70 [Arabidopsis thaliana]	8e-32	294	DNA-binding WRKY [Macleaya cordata], OVA13711.1	3e-93	290
EcWRKY13	Eca_sc194486.1_g1840.1	1635	544	MAGPIE:eca_ECARTPF1_Velvet--Singlet6833	0	543	RecName: Full=WRKY transcription factor 42; AltName: Full=WRKY DNA-binding protein 42 [Arabidopsis thaliana]	9e-98	528	DNA-binding WRKY [Macleaya cordata], OVA09775.1	0	599
EcWRKY14	Eca_sc000774.1_g0410.1	1005	334	MAGPIE:eca_ECARTPF1_Velvet--Singlet44953	1e-98	342	RecName: Full=Probable WRKY transcription factor 41; AltName: Full=WRKY DNA-binding protein 41 [Arabidopsis thaliana]	1e-42	313	DNA-binding WRKY [Macleaya cordata], OVA01933.1	2e-85	344
EcWRKY15	Eca_sc002052.1_g0460.1	1062	353	MAGPIE:eca_ECARTPF1_Velvet--Contig25811	0	449	RecName: Full=Probable WRKY transcription factor 33; AltName: Full=WRKY DNA-binding protein 33 [Arabidopsis thaliana]	3e-30	519	DNA-binding WRKY [Macleaya cordata], OVA12691.1	3e-96	537
EcWRKY16	Eca_sc001936.1_g0700.1	969	322	MAGPIE:eca_ECARTPF1_Velvet--Contig9979	0	322	RecName: Full=Probable WRKY transcription factor 40; AltName: Full=WRKY DNA-binding protein 40 [Arabidopsis thaliana]	1e-76	302	DNA-binding WRKY [Macleaya cordata], OVA09234.1	7e-116	332
EcWRKY17	Eca_sc194540.1_g3890.1	1071	356	MAGPIE:eca_ECARTPF1_Velvet--Contig3092	0	415	RecName: Full=Probable WRKY transcription factor 32; AltName: Full=WRKY DNA-binding protein 32 [Arabidopsis thaliana]	3e-22	466	DNA-binding WRKY [Macleaya cordata], OVA16849.1	2e-99	439
EcWRKY18	Eca_sc035472.1_g0020.1	915	304	MAGPIE:eca_ECARTPF1_assembled--ECARTPF1_rep_c4013	0	259	RecName: Full=Probable WRKY transcription factor 69; AltName: Full=WRKY DNA-binding protein 69 [Arabidopsis thaliana]	8e-35	271	DNA-binding WRKY [Macleaya cordata], OVA02525.1	1e-109	284
EcWRKY19	Eca_sc014828.1_g0060.1	1017	338	MAGPIE:eca_ECARTPF1_Velvet--Contig2293	1e-60	172	RecName: Full=WRKY transcription factor 22; AltName: Full=WRKY DNA-binding protein 22 [Arabidopsis thaliana]	5e-40	298	WRKY transcription factor 22-like [Papaver somniferum]	9e-53	324
EcWRKY20	Eca_sc194624.1_g0220.1	996	331	MAGPIE:eca_ECARTPF1_Velvet--Contig22770	0	330	RecName: Full=WRKY transcription factor 23; AltName: Full=WRKY DNA-binding protein 23 [Arabidopsis thaliana]	8e-50	337	DNA-binding WRKY [Macleaya cordata], OVA16746.1	2e-87	318
EcWRKY21	Eca_sc194624.1_g0620.1	1344	447	MAGPIE:eca_ECARTPF1_Velvet--Singlet11722	0	416	RecName: Full=Probable WRKY transcription factor 57; AltName: Full=WRKY DNA-binding protein 57 [Arabidopsis thaliana]	1e-36	287	PREDICTED: probable WRKY transcription factor 23 [Nelumbo nucifera]	7e-49	310
EcWRKY22	Eca_sc193975.1_g1270.1	1731	576	MAGPIE:eca_ECARTPF1_assembled--ECARTPF1_rep_c18414	5e-99	169	RecName: Full=Probable WRKY transcription factor 72; AltName: Full=WRKY DNA-binding protein 72 [Arabidopsis thaliana]	1e-65	548	probable WRKY transcription factor 72 [Papaver somniferum]	8e-150	612
EcWRKY23	Eca_sc000153.1_g1770.1	816	271	MAGPIE:eca_ECARTPF1_Velvet--Singlet9993	0	164	RecName: Full=Probable WRKY transcription factor 12; AltName: Full=WRKY DNA-binding protein 12 [Arabidopsis thaliana]	1e-63	218	probable WRKY transcription factor 12 [Papaver somniferum]	1e-79	256
EcWRKY24	Eca_sc000193.1_g1170.1	1293	430	MAGPIE:eca_ECARTPF1_Velvet--Singlet6833	9e-50	543	RecName: Full=Probable WRKY transcription factor 47; AltName: Full=WRKY DNA-binding protein 47 [Arabidopsis thaliana]	4e-58	489	DNA-binding WRKY [Macleaya cordata], OVA16621.1	4e-49	527
EcWRKY25	Eca_sc188774.1_g0010.1	1836	611	MAGPIE:eca_ECARTPF1_assembled--ECARTPF1_rep_c991	0	609	RecName: Full=WRKY transcription factor 6; AltName: Full=WRKY DNA-binding protein 6; Short=AtWRKY6 [Arabidopsis thaliana]	2e-122	553	DNA-binding WRKY [Macleaya cordata], OVA09775.1	0	599
EcWRKY26	Eca_sc001048.1_g0050.1	1383	460	MAGPIE:eca_ECARTPF1_Velvet--Contig10949	0	460	RecName: Full=Probable WRKY transcription factor 14; AltName: Full=AR411; AltName: Full=WRKY DNA-binding protein 14 [Arabidopsis thaliana]	3e-86	430	probable WRKY transcription factor 14 [Papaver somniferum]	2e-144	513
EcWRKY27	Eca_sc014577.1_g1270.1	996	331	MAGPIE:eca_ECARTPF1_Velvet--Singlet6340	9e-112	369	RecName: Full=Probable WRKY transcription factor 39; AltName: Full=WRKY DNA-binding protein 39 [Arabidopsis thaliana]	1e-80	330	DNA-binding WRKY [Macleaya cordata], OVA05322.1	2e-107	353
EcWRKY28	Eca_sc194627.1_g0820.1	711	236	MAGPIE:eca_ECARTPF1_Velvet--Contig10467	8e-136	246	RecName: Full=Probable WRKY transcription factor 35; AltName: Full=WRKY DNA-binding protein 35 [Arabidopsis thaliana]	7e-31	427	DNA-binding WRKY [Macleaya cordata], OVA02525.1	4e-64	284
EcWRKY29	Eca_sc194627.1_g0450.1	1194	397	MAGPIE:eca_ECARTPF1_assembled--ECARTPF1_rep_c1869	0	397	RecName: Full=WRKY transcription factor 22; AltName: Full=WRKY DNA-binding protein 22 [Arabidopsis thaliana]	1e-46	298	DNA-binding WRKY [Macleaya cordata], OVA16948.1	7e-60	399
EcWRKY30	Eca_sc194718.1_g0150.1	525	174	MAGPIE:eca_ECARTPF1_assembled--ECARTPF1_rep_c3185	0	174	RecName: Full=Probable WRKY transcription factor 11; AltName: Full=WRKY DNA-binding protein 11 [Arabidopsis thaliana]	3e-68	325	DNA-binding WRKY [Macleaya cordata], OVA13043.1	2e-91	341
EcWRKY31	Eca_sc194541.1_g0680.1	777	258	MAGPIE:eca_ECARTPF1_Velvet--Contig7100	7e-175	260	RecName: Full=Probable WRKY transcription factor 43; AltName: Full=WRKY DNA-binding protein 43 [Arabidopsis thaliana]	4e-53	109	probable WRKY transcription factor 56 [Papaver somniferum]	6e-65	257
EcWRKY32	Eca_sc194541.1_g0990.1	876	291	MAGPIE:eca_ECARTPF1_Velvet--Singlet42707	0	291	RecName: Full=Probable WRKY transcription factor 65; AltName: Full=WRKY DNA-binding protein 65 [Arabidopsis thaliana]	1e-72	259	DNA-binding WRKY [Macleaya cordata], OVA06930.1	7e-117	313
EcWRKY33	Eca_sc002191.1_g0270.1	1047	348	MAGPIE:eca_ECARTPF1_Velvet--Contig27976	0	265	RecName: Full=WRKY transcription factor 71; AltName: Full=WRKY DNA-binding protein 71 [Arabidopsis thaliana]	6e-48	282	WRKY transcription factor 71-like [Papaver somniferum]	4e-77	379
EcWRKY34	Eca_sc015821.1_g0220.1	954	317	MAGPIE:eca_ECARTPF1_Velvet--Contig3564	9e-23	412	RecName: Full=Probable WRKY transcription factor 49; AltName: Full=WRKY DNA-binding protein 49 [Arabidopsis thaliana]	1e-47	274	DNA-binding WRKY [Macleaya cordata], OVA17832.1	4e-88	298
EcWRKY35	Eca_sc003662.1_g0020.1	1125	374	MAGPIE:eca_ECARTPF1_Velvet--Contig2293	0	172	RecName: Full=WRKY transcription factor 22; AltName: Full=WRKY DNA-binding protein 22 [Arabidopsis thaliana]	1e-34	298	WRKY transcription factor 22-like isoform X2 [Papaver somniferum]	7e-47	320
EcWRKY36	Eca_sc001705.1_g0090.1	645	214	MAGPIE:eca_ECARTPF1_assembled--ECARTPF1_rep_c6980	0	214	RecName: Full=Probable WRKY transcription factor 75; AltName: Full=WRKY DNA-binding protein 75 [Arabidopsis thaliana]	8e-54	145	PREDICTED: probable WRKY transcription factor 75 [Nelumbo nucifera]	5e-60	184
EcWRKY37	Eca_sc194693.1_g1320.1	1122	373	MAGPIE:eca_ECARTPF1_Velvet--Contig23852	0	361	RecName: Full=WRKY transcription factor 22; AltName: Full=WRKY DNA-binding protein 22 [Arabidopsis thaliana]	8e-56	298	DNA-binding WRKY [Macleaya cordata], OVA16948.1	6e-122	399
EcWRKY38	Eca_sc000585.1_g0210.1	1038	345	MAGPIE:eca_ECARTPF1_Velvet--Contig1831	0	345	RecName: Full=WRKY transcription factor 71; AltName: Full=WRKY DNA-binding protein 71 [Arabidopsis thaliana]	1e-51	282	WRKY transcription factor 71-like [Papaver somniferum]	5e-72	379
EcWRKY39	Eca_sc001875.1_g0400.1	1056	351	MAGPIE:eca_ECARTPF1_Velvet--Contig3564	0	351	RecName: Full=Probable WRKY transcription factor 57; AltName: Full=WRKY DNA-binding protein 57 [Arabidopsis thaliana]	6e-52	287	DNA-binding WRKY [Macleaya cordata], OVA07904.1	2e-70	320
EcWRKY40	Eca_sc000725.1_g1020.1	978	325	MAGPIE:eca_ECARTPF1_Velvet--Singlet42962	0	324	RecName: Full=WRKY transcription factor 23; AltName: Full=WRKY DNA-binding protein 23 [Arabidopsis thaliana]	1e-43	337	PREDICTED: probable WRKY transcription factor 48 [Nelumbo nucifera]	4e-66	299
EcWRKY41	Eca_sc000325.1_g1390.1	543	180	MAGPIE:eca_ECARTPF1_Velvet--Contig25557	0	180	RecName: Full=Probable WRKY transcription factor 75; AltName: Full=WRKY DNA-binding protein 75 [Arabidopsis thaliana]	9e-52	145	PREDICTED: probable WRKY transcription factor 75 [Nelumbo nucifera]	4e-54	184
EcWRKY42	Eca_sc006961.1_g0400.1	687	228	MAGPIE:eca_ECARTPF1_Velvet--Contig14948	0	260	RecName: Full=Probable WRKY transcription factor 75; AltName: Full=WRKY DNA-binding protein 75 [Arabidopsis thaliana]	1e-52	145	DNA-binding WRKY [Macleaya cordata], OVA09580.1	2e-67	221
EcWRKY43	Eca_sc013752.1_g0230.1	945	314	MAGPIE:eca_ECARTPF1_Velvet--Contig15909	0	320	RecName: Full=WRKY transcription factor 55; AltName: Full=WRKY DNA-binding protein 55 [Arabidopsis thaliana]	2e-37	292	WRKY transcription factor 55-like [Papaver somniferum]	2e-55	326
EcWRKY44	Eca_sc194480.1_g0450.1	990	329	MAGPIE:eca_ECARTPF1_Velvet--Singlet39515	0	329	RecName: Full=Probable WRKY transcription factor 53; AltName: Full=WRKY DNA-binding protein 53 [Arabidopsis thaliana]	1e-37	324	DNA-binding WRKY [Macleaya cordata], OVA11453.1	1e-64	347
EcWRKY45	Eca_sc194641.1_g0500.1	1035	344	MAGPIE:eca_ECARTPF1_Velvet--Contig15045	0	344	RecName: Full=Probable WRKY transcription factor 74; AltName: Full=WRKY DNA-binding protein 74 [Arabidopsis thaliana]	2e-98	330	probable WRKY transcription factor 21 [Papaver somniferum]	2e-55	367
EcWRKY46	Eca_sc057080.1_g0140.1	744	247	MAGPIE:eca_ECARTPF1_Velvet--Singlet29779	0	347	RecName: Full=Probable WRKY transcription factor 7; AltName: Full=WRKY DNA-binding protein 7 [Arabidopsis thaliana]	4e-93	353	DNA-binding WRKY [Macleaya cordata], OVA15888.1	2e-179	354
EcWRKY47	Eca_sc001754.1_g0640.1	1041	346	MAGPIE:eca_ECARTPF1_Velvet--Singlet29779	0	347	RecName: Full=Probable WRKY transcription factor 7; AltName: Full=WRKY DNA-binding protein 7 [Arabidopsis thaliana]	4e-93	353	probable WRKY transcription factor 7 [Papaver somniferum]	6e-151	384
EcWRKY48	Eca_sc000537.1_g1450.1	738	245	MAGPIE:eca_ECARTPF1_Velvet--Singlet6340	0	327	RecName: Full=Probable WRKY transcription factor 21; AltName: Full=WRKY DNA-binding protein 21 [Arabidopsis thaliana]	7e-85	380	DNA-binding WRKY [Macleaya cordata], OVA05322.1	6e-106	353
EcWRKY49	Eca_sc000399.1_g0520.1	1131	376	MAGPIE:eca_ECARTPF1_Velvet--Contig1192	0	374	RecName: Full=Probable WRKY transcription factor 7; AltName: Full=WRKY DNA-binding protein 7 [Arabidopsis thaliana]	2e-77	353	DNA-binding WRKY [Macleaya cordata], OVA15888.1	8e-159	354
EcWRKY50	Eca_sc000360.1_g0330.1	1035	344	MAGPIE:eca_ECARTPF1_Velvet--Singlet44953	6e-159	342	RecName: Full=Probable WRKY transcription factor 41; AltName: Full=WRKY DNA-binding protein 41 [Arabidopsis thaliana]	7e-45	313	DNA-binding WRKY [Macleaya cordata], OVA01933.1	5e-86	344
