# Supplementary material for: Genome-Wide Profiling of WRKY Genes Involved in Benzylisoquinoline Alkaloid Biosynthesis in California Poppy (Eschscholzia californica)
Source: Front Plant Sci. 2021 Jun 17;12:699326. doi: 10.3389/fpls.2021.699326 (PMC8248504; doi:10.3389/fpls.2021.699326)
Supplement: Supplementary file 3 [file Table_2.xlsx]

## Sheet: Sheet1
Supplementary Table S2 Primer sequences for qRT-PCR.
Primer name	Oligonucleotide sequences (5' to 3')
EcBBE Fw	GAGATTAGTAGGAGTTGGGGTGAGA
EcBBE Rv	ATTGGAGGGATACTTTGTGGATG
Ec6OMT Fw	CCTGTTCAACCCGTTGACTTAG
Ec6OMT Rv	CCCAACCCTTAATCAGAAATTTG
EcCYP719A9 Fw	TTGATAACCCTTCATCCAACCTAC
EcCYP719A9 Rv	CACGAGGAACACAATTAACAACAAC
EcbHLH1-1 Fw	CTAGACAGATCGCCTGTTTTGTTG
EcbHLH1-1 Rv	GAGATAGATGACCCTTTAGATAATGAGATCC
EcbHLH1-2 Fw	GGTTGGACAAATCACCAGCTTTAC
EcbHLH1-2 Rv	AAGATAGAGGGGTTCATAATGATAGCAAG
EcAP2/ERF2 Fw	CGGAATCTGACATCAAGCCTTC
EcAP2/ERF2 Rv	GCGATAGCAAGGGAAAGTCAAA
EcAP2/ERF3 Fw	AACACCTTCTCAGCGATTTTG
EcAP2/ERF3 Rv	TCTGTGACTTGGAAATTCTGTTGG
EcAP2/ERF4 Fw	TGAAAATGGCAACTCAAGACGA
EcAP2/ERF4 Rv	AGAAACCGCCGGAATTTCAA
EcAP2/ERF12 Fw	TACAGCCGAAGAGGCAGCTTTA
EcAP2/ERF12 Rv	CACCACAGGAGAACACCCTTCT
EcWRKY3 Fw	AACCTTTGTTCGCCATTCAG
EcWRKY3 Rv	TTGCTTTTGCCCGTATTTTC
EcWRKY10 Fw	CCTCACCAACTGCTTCGACT
EcWRKY10 Rv	AATTCCAACTGGAGCCGAG
EcWRKY13 Fw	TATTATCGCTGCACCATGGC
EcWRKY13 Rv	GCCATTTCCATTGCTGCTG
EcWRKY16 Fw	TCGCCTCATAGTGAAGGATGG
EcWRKY16 Rv	TTTTGACAGGGCAGCTAGGAG
EcWRKY18 Fw	CACCTCAAATCACAACCACCC
EcWRKY18 Rv	ATGCGGGTGGTTCTTCTTTTG
EcWRKY25 Fw	CATCGCAAGCAGTGTCTATGC
EcWRKY25 Rv	CAGTAGGAAAGGGTGCTGAAGC
EcWRKY36 Fw	CAAGTGCAACGGCTGTCTA
EcWRKY36 Rv	TCGGTAGGCTTCTCGATAGGA
EcWRKY41 Fw	GGCTTTCAGGGTTGGATTCT
EcWRKY41 Rv	CCACCACCACTTGGACTCTC
EcWRKY42 Fw	CACAACAAGGATGCAATGTGA
EcWRKY42 Rv	GTCTGGAGATTTATTGATGGGATG
EcWRKY49 Fw	GCCACCGGAAAACCCTAAAT
EcWRKY49 Rv	CCCAAACCCATAGGAGCTCTT
EcActin Fw	TGTGCTCTCCCTTTATGCCA
EcActin Rv	TAAATCTCGTCCGGCAAGGT
