# Supplementary material for: Genome-Wide Profiling of WRKY Genes Involved in Benzylisoquinoline Alkaloid Biosynthesis in California Poppy (Eschscholzia californica)
Source: Front Plant Sci. 2021 Jun 17;12:699326. doi: 10.3389/fpls.2021.699326 (PMC8248504; doi:10.3389/fpls.2021.699326)
Supplement: Supplementary file 4 [file Table_3.XLSX]

## Sheet: Sheet1
Supplementary Table S3 Summary of the numbers within each group of the WRKY superfamily in 8 plant species.
Species	Genome size (Mb)	Group I	Group IIa	Groupo IIb	Group IIc	Group IId	Group IIe	Group III	Other	Total
Eschscholzia californica	504	11	1	4	13	6	8	7		50
Arabidopsis thaliana	125	13	4	7	18	7	9	14	2	74
Ananas comosus	526	12	2	7	13	7	5	8		54
Aquilaria sinensis	773	9	3	9	20	8	10	9	2	70
Catharanthus roseus	738	11	3	5	13	4	7	5	4	52
Cucumis sativus	367	10	4	4	16	8	7	6		55
Manihot esculenta	760	17	5	14	20	8	9	12		85
Gossypium raimondii	880	20	7	16	37	15	13	12		120
