# Supplementary material for: Genome-Wide Profiling of WRKY Genes Involved in Benzylisoquinoline Alkaloid Biosynthesis in California Poppy (Eschscholzia californica)
Source: Front Plant Sci. 2021 Jun 17;12:699326. doi: 10.3389/fpls.2021.699326 (PMC8248504; doi:10.3389/fpls.2021.699326)
Supplement: Supplementary file 5 [file Table_4.XLSX]

## Sheet: Sheet1
Supplementary Table S4 List of MeJA-responsive genes encoding putative transporters.
Gene ID	Annotation	Predicted length
Eca_sc000034.1_g2110.1	Tag=/fd;Nr=XP_010242173.1 PREDICTED: aquaporin NIP1-1-like [Nelumbo nucifera], E-value: e-153, Identity: 72.78 %;Araport=AT4G18910.1 | NOD26-like intrinsic protein 1%3B2 | Chr4:10366211-10368179 FORWARD LENGTH=294 | 201606, E-value: e-134, Identity: 63.94 %	885
Eca_sc000071.1_g0470.1	Tag=/pd;Nr=XP_010262662.1 PREDICTED: protein NRT1/ PTR FAMILY 5.6 [Nelumbo nucifera], E-value: 0.0, Identity: 67.96 %;Araport=AT2G37900.1 | Major facilitator superfamily protein | Chr2:15864396-15866408 REVERSE LENGTH=575 | 201606, E-value: 0.0, Identity: 56.91 %	1848
Eca_sc000451.1_g1250.1	Tag=/fd;Nr=XP_010249747.1 PREDICTED: mitochondrial arginine transporter BAC2 [Nelumbo nucifera], E-value: e-173, Identity: 73.10 %;Araport=AT1G79900.1 | Mitochondrial substrate carrier family protein | Chr1:30052524-30053599 REVERSE LENGTH=296 | 201606, E-value: e-141, Identity: 63.60 %	951
Eca_sc000451.1_g1270.1	Tag=/fd;Nr=XP_010249747.1 PREDICTED: mitochondrial arginine transporter BAC2 [Nelumbo nucifera], E-value: 9e-44, Identity: 70.79 %;Araport=AT1G79900.1 | Mitochondrial substrate carrier family protein | Chr1:30052524-30053599 REVERSE LENGTH=296 | 201606, E-value: 9e-29, Identity: 57.52 %	342
Eca_sc000683.1_g0340.1	Tag=/fd;Nr=XP_011005363.1 PREDICTED: UNC93-like protein 1 [Populus euphratica], E-value: 0.0, Identity: 76.88 %;Araport=AT1G18010.1 | Major facilitator superfamily protein | Chr1:6199980-6201359 FORWARD LENGTH=459 | 201606, E-value: 0.0, Identity: 69.54 %	1392
Eca_sc000742.1_g0020.1	Tag=/pd;Nr=XP_010263028.1 PREDICTED: purine permease 1-like [Nelumbo nucifera], E-value: e-114, Identity: 68.31 %;Araport=AT1G28230.1 | purine permease 1 | Chr1:9862200-9864554 REVERSE LENGTH=356 | 201606, E-value: 1e-81, Identity: 47.32 %	732
Eca_sc000774.1_g0530.1	Tag=/fd;Nr=XP_006490591.1 PREDICTED: ABC transporter C family member 10-like [Citrus sinensis], E-value: 0.0, Identity: 71.95 %;Araport=AT3G59140.1 | multidrug resistance-associated protein 14 | Chr3:21863519-21868701 REVERSE LENGTH=1453 | 201606, E-value: 0.0, Identity: 65.58 %	4431
Eca_sc000797.1_g1440.1	Tag=/pd;Nr=XP_010263028.1 PREDICTED: purine permease 1-like [Nelumbo nucifera], E-value: e-154, Identity: 60.36 %;Araport=AT1G28220.1 | purine permease 3 | Chr1:9860303-9861434 REVERSE LENGTH=351 | 201606, E-value: e-108, Identity: 39.11 %	1161
Eca_sc000958.1_g0010.1	Tag=/partial/fd;Nr=XP_010259506.1 PREDICTED: bidirectional sugar transporter SWEET16-like isoform X1 [Nelumbo nucifera], E-value: e-139, Identity: 70.79 %;Araport=AT4G15920.1 | Nodulin MtN3 family protein | Chr4:9030742-9033343 REVERSE LENGTH=241 | 201606, E-value: 2e-68, Identity: 36.42 %	878
Eca_sc001047.1_g0760.1	Tag=/fd;Nr=XP_010262844.1 PREDICTED: ABC transporter G family member 31-like [Nelumbo nucifera], E-value: 0.0, Identity: 75.73 %;Araport=AT2G29940.1 | pleiotropic drug resistance 3 | Chr2:12760139-12766455 FORWARD LENGTH=1426 | 201606, E-value: 0.0, Identity: 71.82 %	4305
Eca_sc001048.1_g4520.1	Tag=/pd;Nr=XP_010263028.1 PREDICTED: purine permease 1-like [Nelumbo nucifera], E-value: e-132, Identity: 51.35 %;Araport=AT1G28220.1 | purine permease 3 | Chr1:9860303-9861434 REVERSE LENGTH=351 | 201606, E-value: e-108, Identity: 40.54 %	1113
Eca_sc001363.1_g1470.1	Tag=/fd;Nr=XP_010255510.1 PREDICTED: ABC transporter B family member 15-like [Nelumbo nucifera], E-value: 0.0, Identity: 75.33 %;Araport=AT3G28345.1 | ABC transporter family protein | Chr3:10593921-10598775 REVERSE LENGTH=1240 | 201606, E-value: 0.0, Identity: 69.26 %	3858
Eca_sc002087.1_g0590.1	Tag=/pd;Nr=XP_002307351.2 PURINE PERMEASE 1 family protein [Populus trichocarpa] EEE94347.2 PURINE PERMEASE 1 family protein [Populus trichocarpa], E-value: e-154, Identity: 60.17 %;Araport=AT1G28230.1 | purine permease 1 | Chr1:9862200-9864554 REVERSE LENGTH=356 | 201606, E-value: e-126, Identity: 55.52 %	1035
Eca_sc002087.1_g0610.1	Tag=/fd;Nr=XP_006426307.1 hypothetical protein CICLE_v10025480mg [Citrus clementina] ESR39547.1 hypothetical protein CICLE_v10025480mg [Citrus clementina], E-value: 0.0, Identity: 72.23 %;Araport=AT5G65380.1 | MATE efflux family protein | Chr5:26123241-26126352 REVERSE LENGTH=486 | 201606, E-value: 0.0, Identity: 65.19 %	1494
Eca_sc002160.1_g1280.1	Tag=/pd;Nr=XP_010263028.1 PREDICTED: purine permease 1-like [Nelumbo nucifera], E-value: 3e-97, Identity: 63.63 %;Araport=AT1G28230.1 | purine permease 1 | Chr1:9862200-9864554 REVERSE LENGTH=356 | 201606, E-value: 2e-65, Identity: 43.18 %	663
Eca_sc002160.1_g1320.1	Tag=/pd;Nr=XP_010263028.1 PREDICTED: purine permease 1-like [Nelumbo nucifera], E-value: e-158, Identity: 61.33 %;Araport=AT1G28220.1 | purine permease 3 | Chr1:9860303-9861434 REVERSE LENGTH=351 | 201606, E-value: e-106, Identity: 38.93 %	1128
Eca_sc002166.1_g0640.1	Tag=/fd;Nr=XP_008227518.1 PREDICTED: amino acid permease 4 isoform X1 [Prunus mume], E-value: 0.0, Identity: 79.57 %;Araport=AT5G09220.1 | amino acid permease 2 | Chr5:2866867-2868863 FORWARD LENGTH=493 | 201606, E-value: 0.0, Identity: 73.68 %	1428
Eca_sc002218.1_g0890.1	Tag=/pd;Nr=XP_010265161.1 PREDICTED: protein NRT1/ PTR FAMILY 3.1-like [Nelumbo nucifera], E-value: 3e-46, Identity: 53.57 %;Araport=AT1G68570.1 | Major facilitator superfamily protein | Chr1:25746811-25750110 FORWARD LENGTH=596 | 201606, E-value: 3e-44, Identity: 54.28 %	423
Eca_sc002478.1_g0800.1	Tag=/pseudo/pd;Nr=CDP05819.1 unnamed protein product [Coffea canephora], E-value: 2e-44, Identity: 44.25 %;Araport=AT3G20660.1 | organic cation/carnitine transporter4 | Chr3:7225271-7228510 REVERSE LENGTH=526 | 201606, E-value: 8e-42, Identity: 39.65 %	525
Eca_sc002730.1_g0460.1	Tag=/pd;Nr=CDO97684.1 unnamed protein product [Coffea canephora], E-value: 6e-22, Identity: 29.62 %;Araport=AT1G51500.1 | ABC-2 type transporter family protein | Chr1:19097967-19100972 REVERSE LENGTH=687 | 201606, E-value: 4e-13, Identity: 21.60 %	489
Eca_sc002730.1_g0500.1	Tag=/fd;Nr=XP_009599105.1 PREDICTED: ABC transporter G family member 11-like, partial [Nicotiana tomentosiformis], E-value: e-120, Identity: 74.56 %;Araport=AT1G17840.1 | white-brown complex-like protein | Chr1:6142870-6145894 FORWARD LENGTH=703 | 201606, E-value: 1e-68, Identity: 50.43 %	699
Eca_sc004324.1_g2000.1	Tag=/fd;Nr=XP_002278197.1 PREDICTED: sugar transporter ERD6-like 16 isoform X1 [Vitis vinifera], E-value: 0.0, Identity: 76.85 %;Araport=AT5G18840.1 | Major facilitator superfamily protein | Chr5:6282954-6286399 FORWARD LENGTH=482 | 201606, E-value: 0.0, Identity: 70.24 %	1455
Eca_sc004559.1_g0090.1	Tag=/pd;Nr=XP_008796381.1 PREDICTED: protein DETOXIFICATION 33-like [Phoenix dactylifera] XP_017699438.1 PREDICTED: protein DETOXIFICATION 33-like [Phoenix dactylifera], E-value: 0.0, Identity: 68.73 %;Araport=AT1G47530.1 | MATE efflux family protein | Chr1:17451724-17454110 FORWARD LENGTH=484 | 201606, E-value: e-179, Identity: 54.24 %	1452
Eca_sc006103.1_g1660.1	Tag=/fd;Nr=XP_007034709.1 Major facilitator superfamily protein [Theobroma cacao] EOY05635.1 Major facilitator superfamily protein [Theobroma cacao], E-value: 0.0, Identity: 83.96 %;Araport=AT5G26340.1 | Major facilitator superfamily protein | Chr5:9243851-9246994 REVERSE LENGTH=526 | 201606, E-value: 0.0, Identity: 83.39 %	1593
Eca_sc006485.1_g1550.1	Tag=/pd;Nr=XP_010269378.1 PREDICTED: protein NRT1/ PTR FAMILY 5.4-like isoform X2 [Nelumbo nucifera], E-value: 0.0, Identity: 61.42 %;Araport=AT3G54450.1 | Major facilitator superfamily protein | Chr3:20158534-20161937 FORWARD LENGTH=555 | 201606, E-value: 0.0, Identity: 51.55 %	1644
Eca_sc009048.1_g0010.1	Tag=/partial/pd;Nr=XP_010263028.1 PREDICTED: purine permease 1-like [Nelumbo nucifera], E-value: 7e-47, Identity: 56.25 %;Araport=AT1G28220.1 | purine permease 3 | Chr1:9860303-9861434 REVERSE LENGTH=351 | 201606, E-value: 2e-32, Identity: 35 %	480
Eca_sc011255.1_g0480.1	Tag=/fd;Nr=XP_010271025.1 PREDICTED: ABC transporter B family member 11-like isoform X1 [Nelumbo nucifera] XP_010271026.1 PREDICTED: ABC transporter B family member 11-like isoform X1 [Nelumbo nucifera], E-value: 0.0, Identity: 79.68 %;Araport=AT1G02520.3 | P-glycoprotein 11 | Chr1:524134-528745 FORWARD LENGTH=1278 | 201606, E-value: 0.0, Identity: 72.01 %	3873
Eca_sc011840.1_g0990.1	Tag=/pd;Nr=XP_007046967.1 Sulfite exporter TauE/SafE family protein, putative isoform 1 [Theobroma cacao] EOX91124.1 Sulfite exporter TauE/SafE family protein, putative isoform 1 [Theobroma cacao], E-value: 0.0, Identity: 66.94 %;Araport=AT2G25737.1 | Sulfite exporter TauE/SafE family protein | Chr2:10977174-10979677 FORWARD LENGTH=476 | 201606, E-value: e-179, Identity: 55.92 %	1446
Eca_sc014577.1_g0610.1	Tag=/fd;Nr=XP_010256148.1 PREDICTED: sulfate transporter 3.1-like isoform X1 [Nelumbo nucifera], E-value: 0.0, Identity: 73.42 %;Araport=AT3G51895.2 | sulfate transporter 3%3B1 | Chr3:19251503-19255812 REVERSE LENGTH=703 | 201606, E-value: 0.0, Identity: 70.27 %	2001
Eca_sc015145.1_g0170.1	Tag=/pd;Nr=XP_006349857.1 PREDICTED: inositol transporter 4-like [Solanum tuberosum], E-value: 0.0, Identity: 66.43 %;Araport=AT1G30220.1 | inositol transporter 2 | Chr1:10632957-10635439 REVERSE LENGTH=580 | 201606, E-value: 0.0, Identity: 62.62 %	1737
Eca_sc019626.1_g0060.1	Tag=/pd;Nr=CDO99619.1 unnamed protein product [Coffea canephora], E-value: 6e-67, Identity: 57.80 %;Araport=AT4G21570.1 | organic solute transporter ostalpha protein (DUF300) | Chr4:11471126-11472269 REVERSE LENGTH=294 | 201606, E-value: 7e-58, Identity: 49.71 %	522
Eca_sc035710.1_g1180.1	Tag=/fd;Nr=XP_010273402.1 PREDICTED: bidirectional sugar transporter SWEET2 [Nelumbo nucifera], E-value: e-110, Identity: 79.34 %;Araport=AT3G14770.1 | Nodulin MtN3 family protein | Chr3:4957787-4959202 REVERSE LENGTH=236 | 201606, E-value: 3e-77, Identity: 60.56 %	642
Eca_sc058603.1_g0010.1	Tag=/partial/fd;Nr=XP_010276325.1 PREDICTED: probable polyamine transporter At3g13620 [Nelumbo nucifera], E-value: 0.0, Identity: 70.27 %;Araport=AT3G13620.1 | Amino acid permease family protein | Chr3:4450904-4452556 REVERSE LENGTH=478 | 201606, E-value: e-179, Identity: 60.19 %	1221
Eca_sc100701.1_g2100.1	Tag=/pd;Nr=XP_002279471.2 PREDICTED: ABC transporter B family member 13-like [Vitis vinifera], E-value: 0.0, Identity: 62.86 %;Araport=AT1G27940.2 | P-glycoprotein 13 | Chr1:9733597-9737211 REVERSE LENGTH=1031 | 201606, E-value: 0.0, Identity: 55.36 %	2685
Eca_sc183644.1_g0010.1	Tag=/pd;Nr=XP_010263028.1 PREDICTED: purine permease 1-like [Nelumbo nucifera], E-value: 6e-89, Identity: 65.34 %;Araport=AT1G28230.1 | purine permease 1 | Chr1:9862200-9864554 REVERSE LENGTH=356 | 201606, E-value: 2e-57, Identity: 42.07 %	609
Eca_sc186237.1_g0010.1	Tag=/n;Nr=XP_006833223.1 PREDICTED: copper-transporting ATPase 2 [Amborella trichopoda] ERM98501.1 hypothetical protein AMTR_s00072p00184150 [Amborella trichopoda], E-value: 3e-16, Identity: 44.52 %;Araport=AT2G36950.1 | Heavy metal transport/detoxification superfamily protein | Chr2:15515216-15516754 FORWARD LENGTH=386 | 201606, E-value: 6e-12, Identity: 52.55 %	414
Eca_sc187119.1_g0160.1	Tag=/fd;Nr=XP_007038917.1 Multidrug resistance-associated protein 14 isoform 1 [Theobroma cacao] EOY23418.1 Multidrug resistance-associated protein 14 isoform 1 [Theobroma cacao], E-value: 0.0, Identity: 73.28 %;Araport=AT3G59140.1 | multidrug resistance-associated protein 14 | Chr3:21863519-21868701 REVERSE LENGTH=1453 | 201606, E-value: 0.0, Identity: 65.14 %	4461
Eca_sc194483.1_g0450.1	Tag=/pd;Nr=XP_010263028.1 PREDICTED: purine permease 1-like [Nelumbo nucifera], E-value: e-158, Identity: 61.93 %;Araport=AT1G28220.1 | purine permease 3 | Chr1:9860303-9861434 REVERSE LENGTH=351 | 201606, E-value: e-104, Identity: 38.06 %	1122
Eca_sc194483.1_g0460.1	Tag=/pd;Nr=XP_010263028.1 PREDICTED: purine permease 1-like [Nelumbo nucifera], E-value: e-156, Identity: 61.15 %;Araport=AT1G28220.1 | purine permease 3 | Chr1:9860303-9861434 REVERSE LENGTH=351 | 201606, E-value: e-106, Identity: 38.58 %	1146
Eca_sc194483.1_g0480.1	Tag=/pd;Nr=XP_010263028.1 PREDICTED: purine permease 1-like [Nelumbo nucifera], E-value: e-157, Identity: 61.41 %;Araport=AT1G28220.1 | purine permease 3 | Chr1:9860303-9861434 REVERSE LENGTH=351 | 201606, E-value: e-104, Identity: 38.05 %	1146
Eca_sc194586.1_g0360.1	Tag=/fd;Nr=XP_010260247.1 PREDICTED: MATE efflux family protein LAL5-like [Nelumbo nucifera], E-value: 0.0, Identity: 73.27 %;Araport=AT3G23560.1 | MATE efflux family protein | Chr3:8454361-8456588 REVERSE LENGTH=477 | 201606, E-value: 0.0, Identity: 57.20 %	1440
Eca_sc194650.1_g0350.1	Tag=/pd;Nr=XP_010245114.1 PREDICTED: protein NRT1/ PTR FAMILY 5.10-like [Nelumbo nucifera], E-value: 2e-67, Identity: 47.63 %;Araport=AT1G22540.1 | Major facilitator superfamily protein | Chr1:7964202-7966222 FORWARD LENGTH=557 | 201606, E-value: 1e-55, Identity: 42.48 %	702
Eca_sc194669.1_g0490.1	Tag=/pd;Nr=XP_010260734.1 PREDICTED: cationic amino acid transporter 5-like [Nelumbo nucifera], E-value: 0.0, Identity: 66.38 %;Araport=AT2G34960.1 | cationic amino acid transporter 5 | Chr2:14744175-14745884 REVERSE LENGTH=569 | 201606, E-value: 0.0, Identity: 63.37 %	1797
Eca_sc194673.1_g0160.1	Tag=/pd;Nr=XP_006419536.1 hypothetical protein CICLE_v10005737mg [Citrus clementina] XP_006489052.1 PREDICTED: bidirectional sugar transporter SWEET17-like [Citrus sinensis] ESR32776.1 hypothetical protein CICLE_v10005737mg [Citrus clementina], E-value: 1e-92, Identity: 46.50 %;Araport=AT4G15920.1 | Nodulin MtN3 family protein | Chr4:9030742-9033343 REVERSE LENGTH=241 | 201606, E-value: 3e-71, Id…	861
Eca_sc194701.1_g0240.1	Tag=/pd;Nr=XP_002513994.1 PREDICTED: purine permease 3 [Ricinus communis] EEF48577.1 purine transporter, putative [Ricinus communis], E-value: e-134, Identity: 50.53 %;Araport=AT1G28220.1 | purine permease 3 | Chr1:9860303-9861434 REVERSE LENGTH=351 | 201606, E-value: e-114, Identity: 41.17 %	1125
Eca_sc194701.1_g1850.1	Tag=/fd;Nr=AFI61955.1 polyol transporter [Camellia sinensis], E-value: 0.0, Identity: 75.95 %;Araport=AT3G18830.1 | polyol/monosaccharide transporter 5 | Chr3:6489000-6491209 REVERSE LENGTH=539 | 201606, E-value: 0.0, Identity: 69.57 %	1413
Eca_sc194734.1_g0350.1	Tag=/pd;Nr=XP_010256190.1 PREDICTED: protein NRT1/ PTR FAMILY 2.9-like [Nelumbo nucifera], E-value: 0.0, Identity: 67.55 %;Araport=AT5G62680.1 | Major facilitator superfamily protein | Chr5:25165430-25167822 REVERSE LENGTH=616 | 201606, E-value: 0.0, Identity: 57.73 %	1806
